# Supplementary material for: Genetic characterisation of the recent foot-and-mouth disease virus subtype A/IRN/2005
Source: PubMed Central journal article supplement (PMC2194681; doi:10.1186/1743-422x-4-122), 2007-11-15

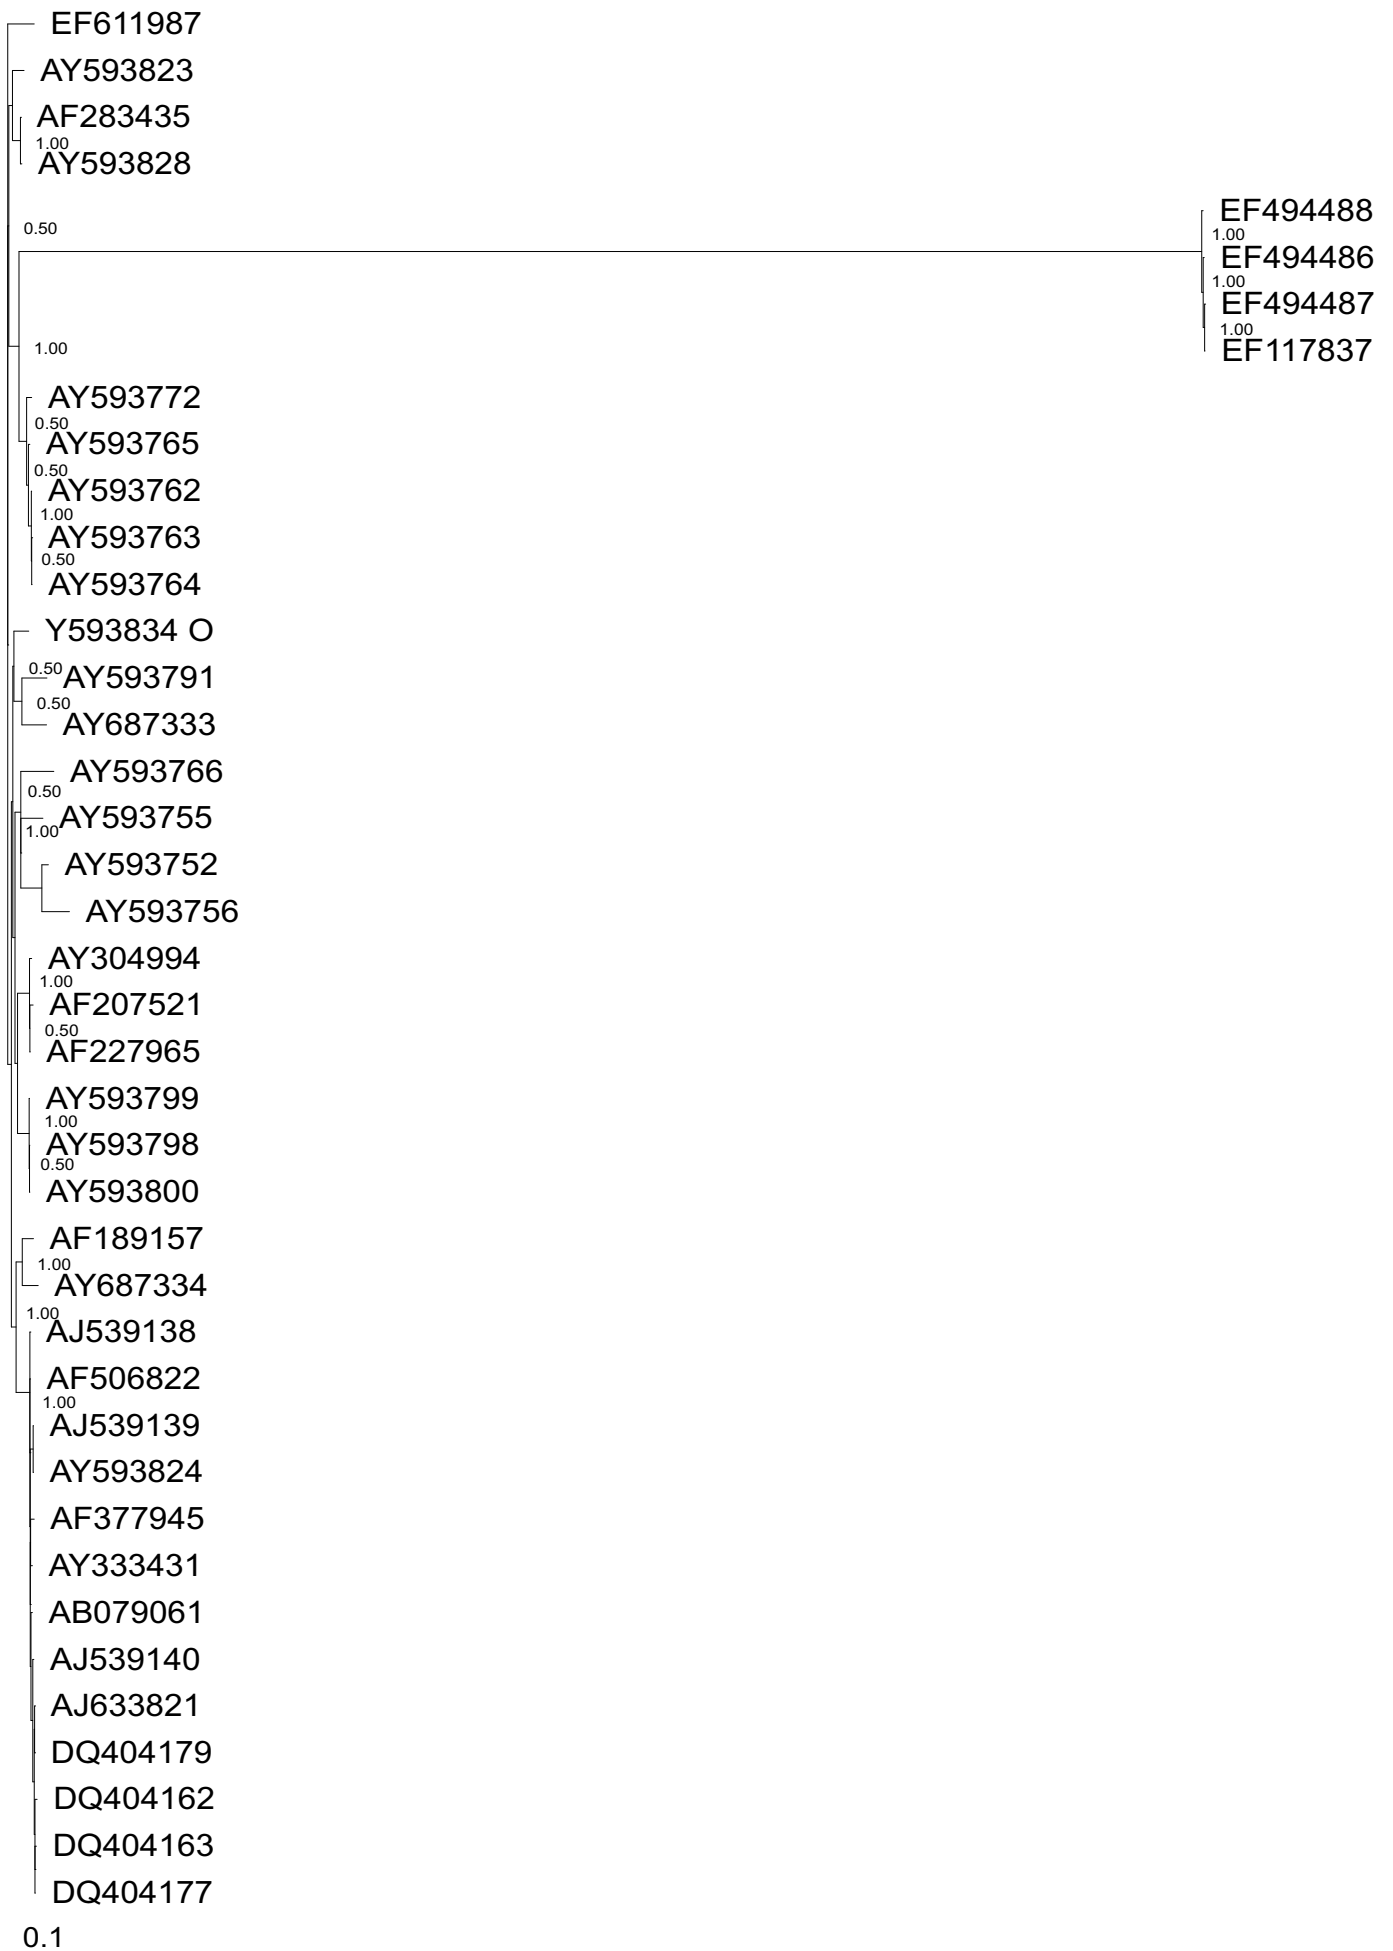

Supplement: 1743-422X-4-122-S2.pdf [file 1743-422X-4-122-S2.pdf]
