# Supplementary material for: Genetic characterisation of the recent foot-and-mouth disease virus subtype A/IRN/2005
Source: PubMed Central journal article supplement (PMC2194681; doi:10.1186/1743-422x-4-122), 2007-11-15
Supplement: 1743-422X-4-122-S4.pdf [file 1743-422X-4-122-S4.pdf]

| Primer name | Forward primer                     | Reverse primer                    |
|-------------|------------------------------------|-----------------------------------|
|             |                                    |                                   |
| 8-A PN 35   | 5'- GAGAAAIGGGACGTCIGCGC - 3'      |                                   |
| 8-A PN 2    |                                    | 5'- CTTCTAIGCCTGAATAGGIGAC - 3'   |
|             |                                    |                                   |
| 10-P PN 23  | 5'- CGCCGTCGCTTGAGGAAGACTT - 3'    |                                   |
| 10-P PN 24  |                                    | 5'- TTCTTTGCGGAGCACAGCAG - 3'     |
|             |                                    |                                   |
| 10-P PN 25  | 5'- TGCATGGTTCGACGGGACAGA - 3'     |                                   |
| 10-P PN 26  |                                    | 5'- CATGAGAAATGGCTGGGACG - 3'     |
|             |                                    |                                   |
| 8-A PN 51   | 5'- CCACAGATCAAGGTGTATGC - 3'      |                                   |
| 8-A PN 6    |                                    | 5'- AACCTGCAITTCATGTIIACIGG - 3'  |
|             |                                    |                                   |
| 8-X PN 8    | 5'- CACATGTCAAACACTTACCTC - 3'     |                                   |
| 10-P PN 11  |                                    | 5'- GACGTGGGTGCCCAATGG - 3'       |
|             |                                    |                                   |
| 10-P PN 27  | 5'- GGGGAAGACCATGTCTCCGGACCTA - 3' |                                   |
| 10-P PN 28  |                                    | 5'- AGGCTTGCCCGACCTTCCTCTGTT - 3' |
|             |                                    |                                   |
| 10-P PN 29  | 5'- GCGTGCAGCCACGTACTACTTCT - 3'   |                                   |
| 10-P PN 30  |                                    | 5'- TCTGGACAGCACCTTTGTCG - 3'     |
|             |                                    |                                   |
| 8-A PN 22   | 5'- AAGGACCCIGTCCTTGTGGC - 3'      |                                   |
| 8-A PN 23   |                                    | 5'- GACCCTGACCACTTIGACGG - 3'     |
|             |                                    |                                   |
| 8-A PN 46   | 5'- TGGTCGTTTGCCTCCGTGG - 3'       |                                   |
| 8-A PN 87   |                                    | 5'- GCAGCAATTGAATTCTTTGAG - 3'    |
|             |                                    |                                   |
| 8-A PN 99   | 5'- TGTACCAICTTGTTAIGAGGTG - 3'    |                                   |
| 8-A PN 68   |                                    | 5'- CCACCAGCTGAAGGACCC - 3'       |
|             |                                    |                                   |
| 8-A PN 113  | 5'- CGCGAIACTCGCAAGAGAC - 3'       |                                   |
| 8-A PN 14   |                                    | 5'- CAGAGTGTGTTGAGTTIGAGAT - 3'   |
|             |                                    |                                   |

|            |                                     |                                       |
|------------|-------------------------------------|---------------------------------------|
| 8-A PN 207 | 5'- CTGGAGTGTTTGGCACTGC - 3'        |                                       |
| 10-P PN 4  |                                     | 5'- CCAAGCTTGCACCCACCG - 3'           |
|            |                                     |                                       |
| 10-P PN 12 | 5'- CCACACCACGAGGGGTTG - 3'         |                                       |
| 10-P PN 13 |                                     | 5'- GCGGTCCGTTGTAATCAA - 3'           |
|            |                                     |                                       |
| 10-P PN 14 | 5'- CTGAAGGACGAAATCCGC - 3'         |                                       |
| 8-A PN 52  |                                     | 5'- GGTTTTGTTCTTGGTCAITCC - 3'        |
|            |                                     |                                       |
| 1-A TBR-1E | 5'- GAGCTGGACACTTACACCATGATCTC - 3' |                                       |
| NVT24      |                                     | 5'- AAAAAAAAAAAAAAAAAAAAAAAAAABN - 3' |
